# Supplementary material
Source: MDPI journal article supplement (https://www.mdpi.com/2073-4441/15/24/4259)
Supplement: s1 [file s1]

Supplementary Materials

# Comparative Screening Study on the Adsorption of Aqueous Pb(II) using Different Metabolically Inhibited Bacterial Cultures from Industry

Patrick Y. Kpai <sup>1</sup>, Jaco Nel <sup>2</sup>, Nils Haneklaus <sup>3</sup>, Evans M. N. Chirwa <sup>1</sup> and Hendrik G. Brink <sup>1,\*</sup>

<sup>1</sup> Department of Chemical Engineering, University of Pretoria, Pretoria 0002, South Africa; kpaipatrick@yahoo.com (P.Y.K.); evans.chirwa@up.ac.za (E.M.N.C.)

<sup>2</sup> Bemical CC, Johannesburg 2000, South Africa; jaco@bemical.com

<sup>3</sup> Td Lab Sustainable Mineral Resources, University for Continuing Education Krems, Dr.-Karl-Dorrek-Straße 30, 3500 Krems, Austria

\* Correspondence: deon.brink@up.ac.za

## Supplementary Materials

### pH Results

**Table S1.** Experimental data for two-phase pseudo-first-order kinetics for metabolically inactive adsorbents.

| Adsorbents | SS   | C1   | C2   | Cons | PB   | KP   |
|------------|------|------|------|------|------|------|
| Initial pH | 5.08 | 5.13 | 5.86 | 4.64 | 4.63 | 6.13 |
| Final pH   | 5.7  | 6.04 | 6.25 | 4.92 | 4.74 | 5.83 |
| Control pH | 4.82 | 4.82 | 4.82 | 4.7  | 4.66 | 5.14 |

**Table S2.** Statistical test for temperature effect.

| Adsorbents | P Value | Statistical Difference in Datasets Statistically Significant (P<0.05)? | Matching P Value | Is There Significant Matching |
|------------|---------|------------------------------------------------------------------------|------------------|-------------------------------|
| SS         | 0.066   | No                                                                     | <0.001           | Yes                           |
| C1         | 0.1376  | No                                                                     | <0.001           | Yes                           |
| C2         | 0.1671  | No                                                                     | <0.001           | Yes                           |
| Cons       | 0.0988  | No                                                                     | <0.001           | Yes                           |
| PB         | 0.2172  | No                                                                     | <0.001           | Yes                           |
| KP         | 0.356   | No                                                                     | <0.001           | Yes                           |

### Kinetic Fits

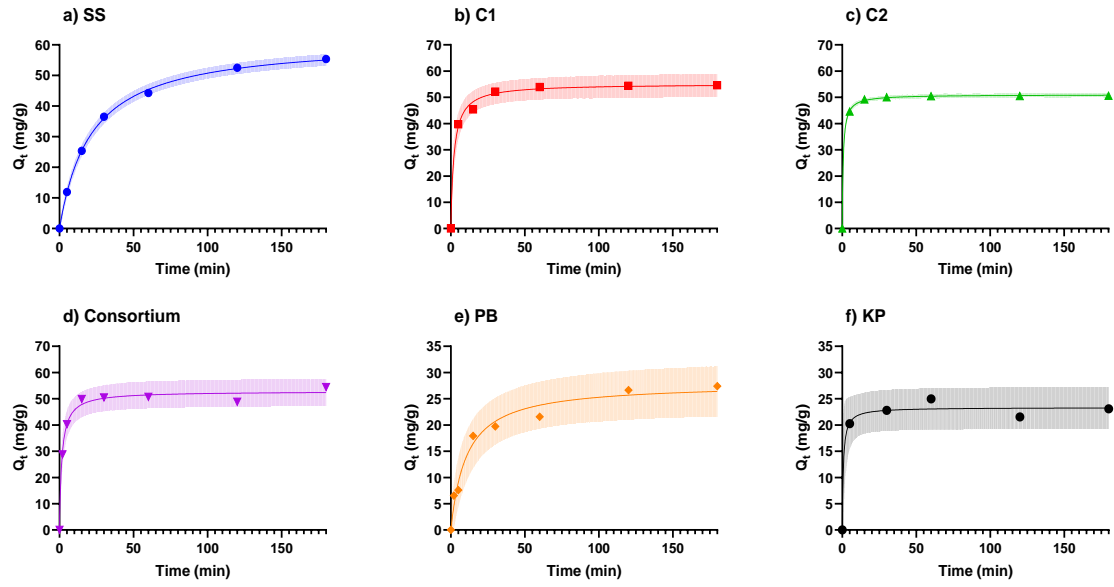

Figure S1. Pseudo-second-order kinetics of Pb(II) onto metabolically inactive adsorbents.

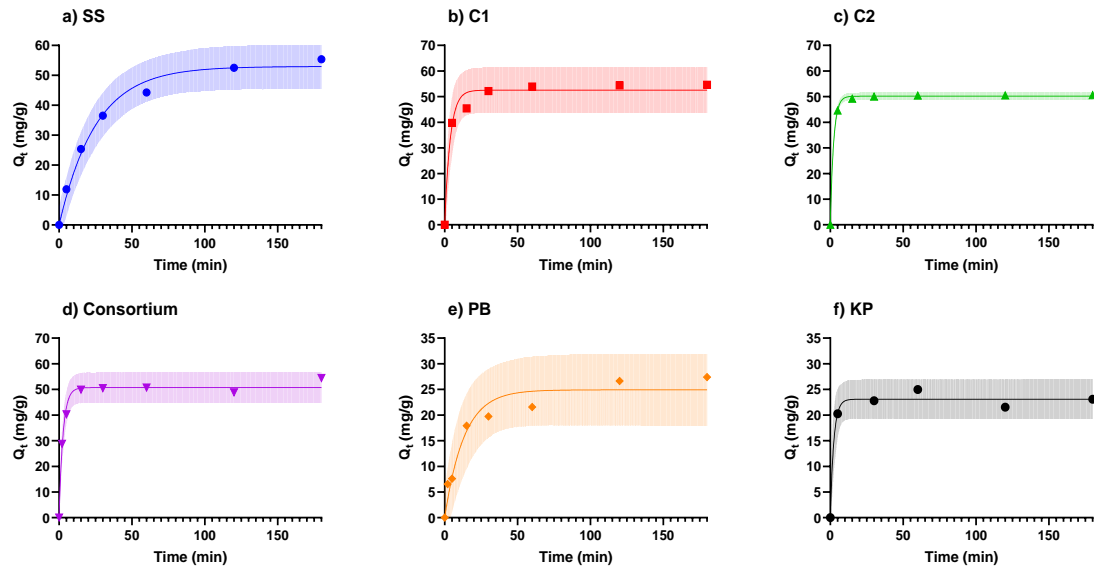

Figure S2. Pseudo-first-order kinetics of Pb(II) onto metabolically inactive adsorbents.

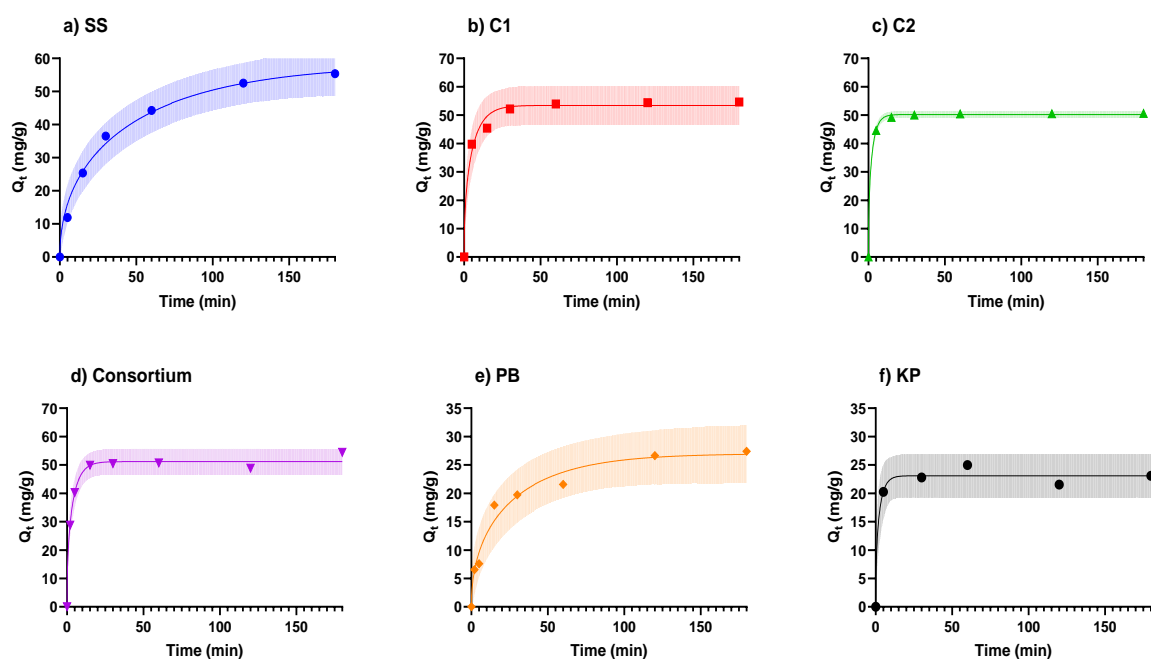

Figure S3. Cranks mass transfer model of Pb(II) onto metabolically inactive adsorbents.

### Isotherm Fits

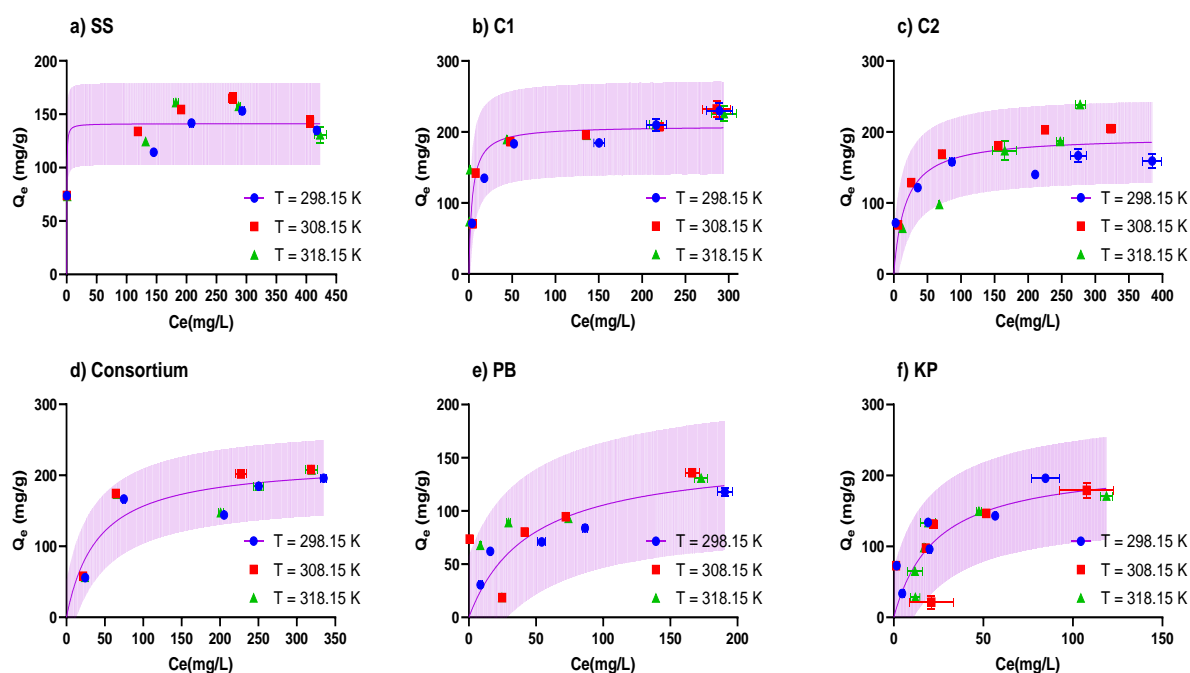

Figure S4. Langmuir isotherm for metabolically inactive adsorbents.

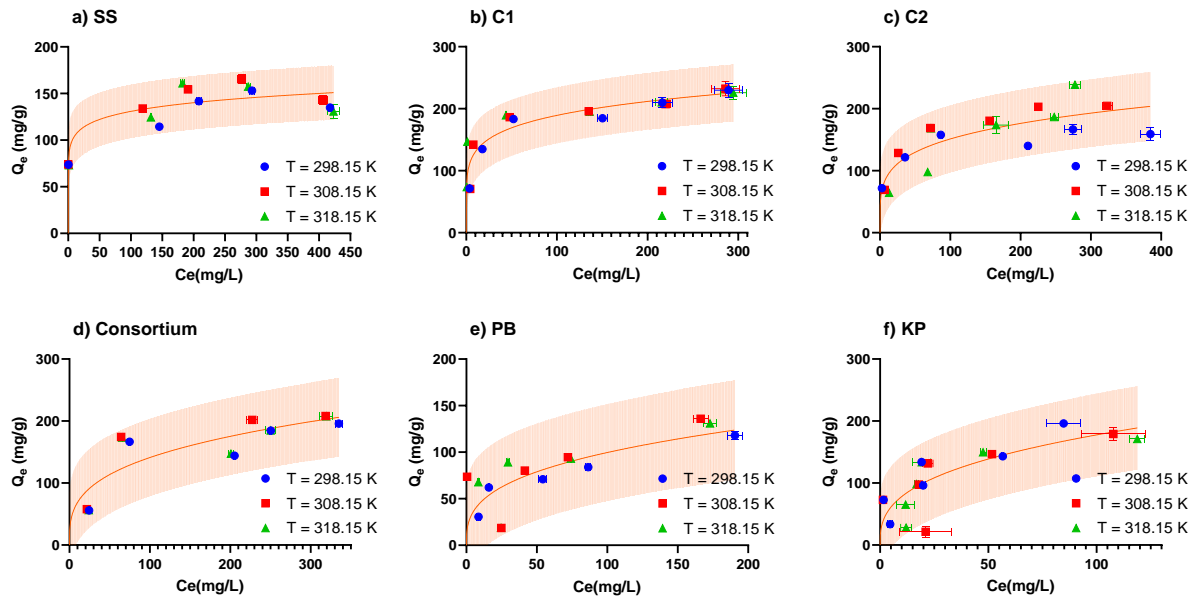

Figure S5. Freundlich isotherm for metabolically inactive adsorbents.

#### BET Hysteresis Loops

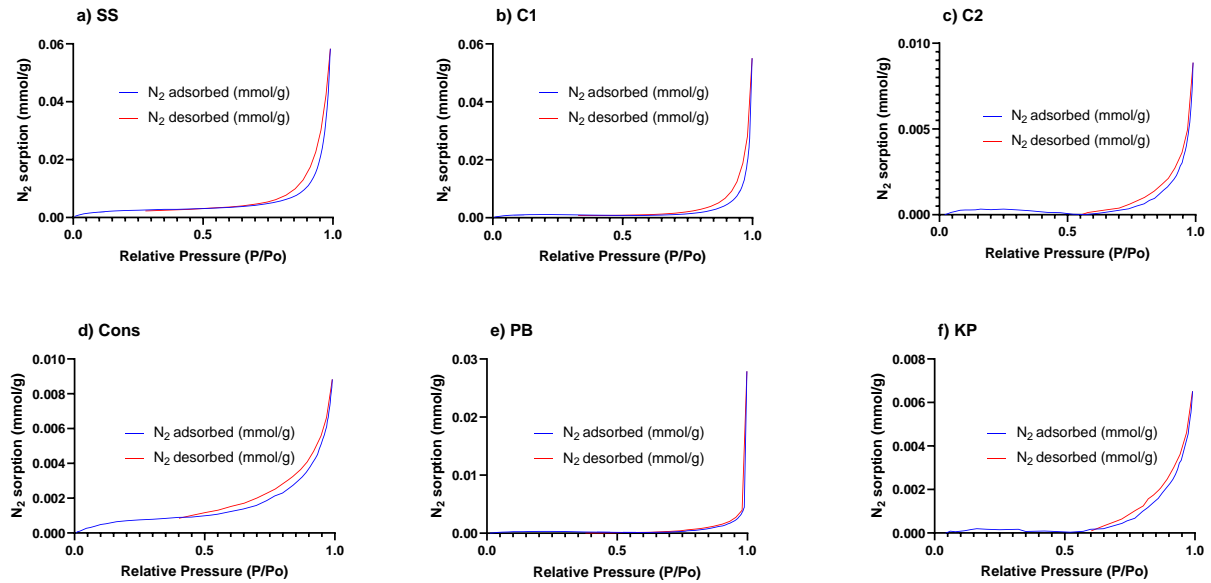

Figure S6. Hysteresis loops for BET for the different biosorbents.

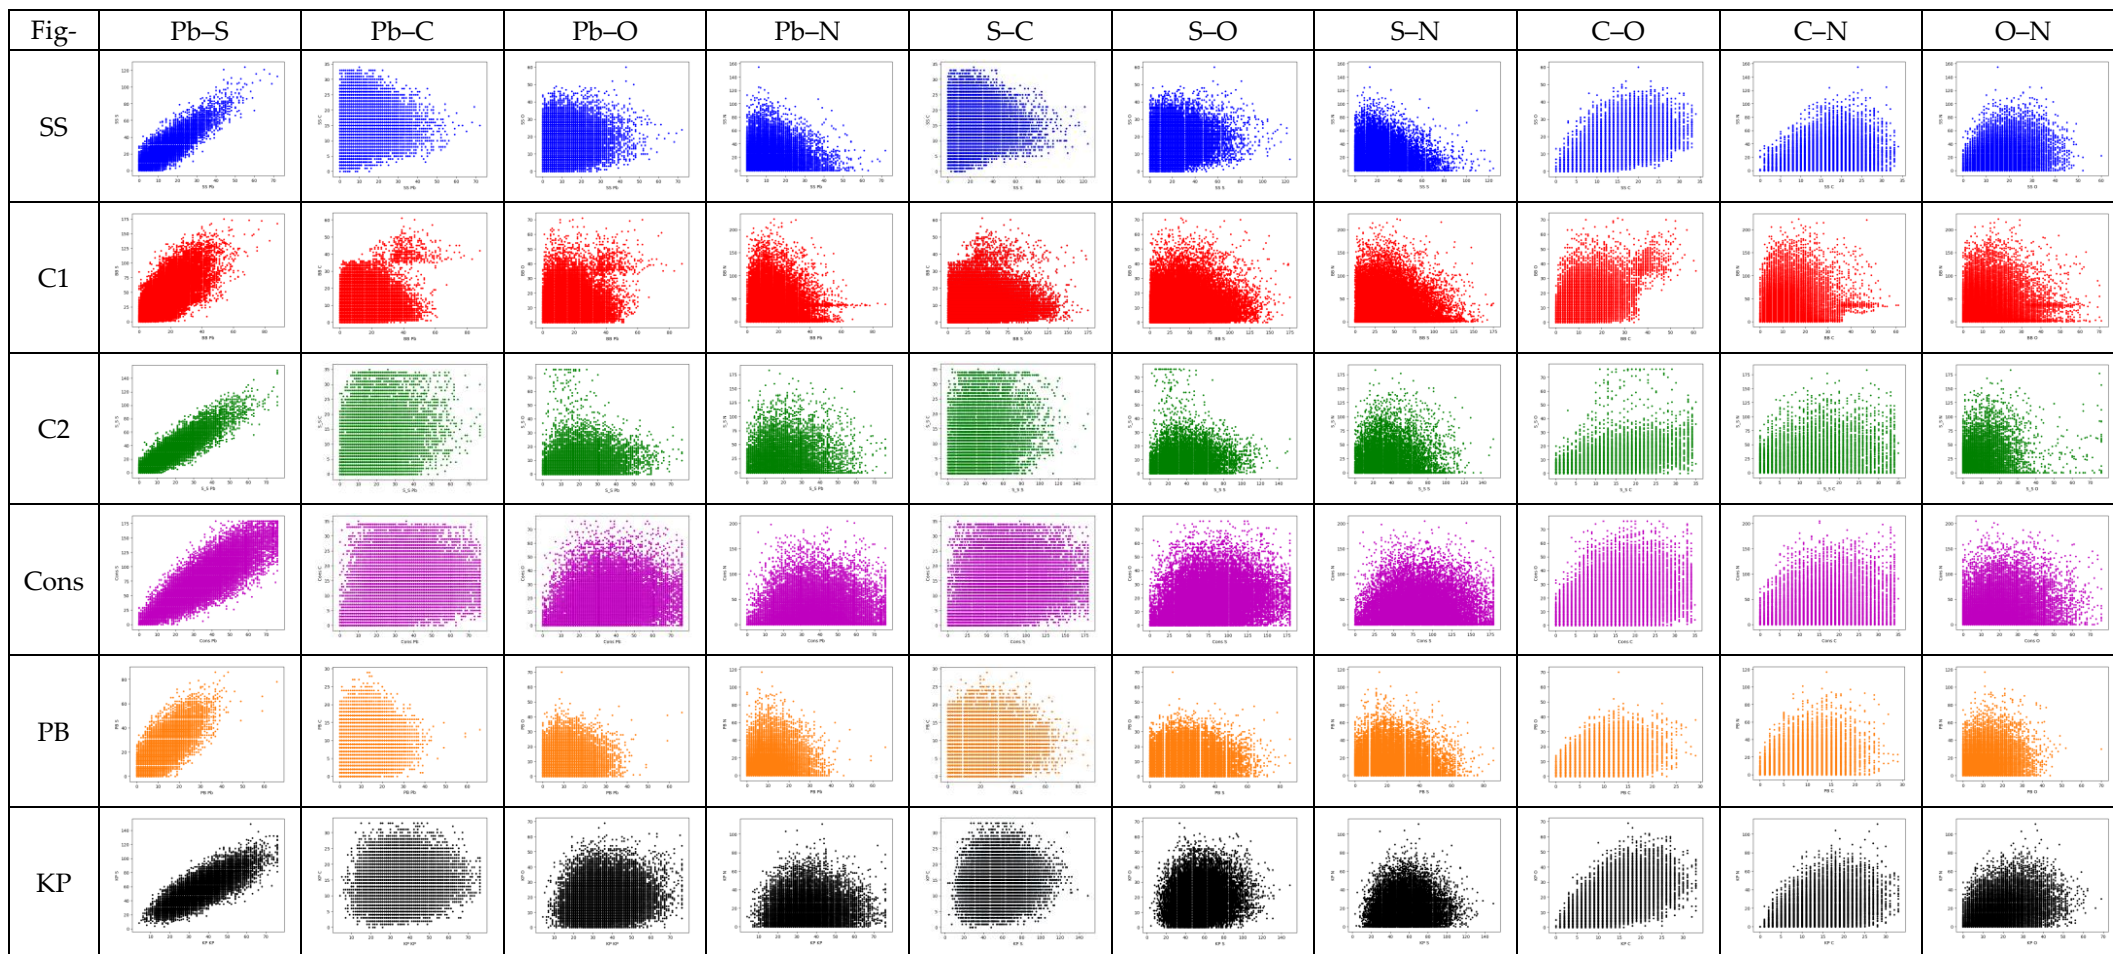

**Figure S7.** Correlation graphs of elemental compositions and location obtained from SEM-EDX.
